# Supplementary material
Source: publisher site journal article supplement (https://www.dovepress.com/article/476691)
Supplement: Supplementary file 1 [file get_supplementary_file.php]

**Supplementary Materials**

**Table** **S1** α diversity index between the control and SD group before SD

| α diversity index | C-0d | SD-0d | *p*-value |
| --- | --- | --- | --- |
| shannon | 4.180 | 5.265 | 0.001 |
| simpson | 0.843 | 0.914 | 0.003 |
| chao1 | 740.134 | 960.842 | 0.003 |
| ace | 754.533 | 989.242 | 0.002 |

C-0d, the control group before SD. SD-0d, the SD group before SD. *p*-value was obtained with Wilcoxon test.

(a) (b) (c)


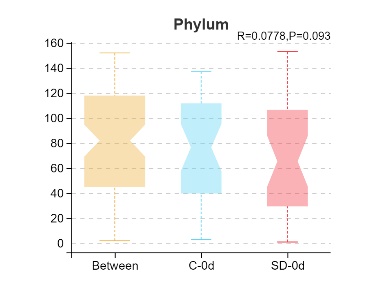

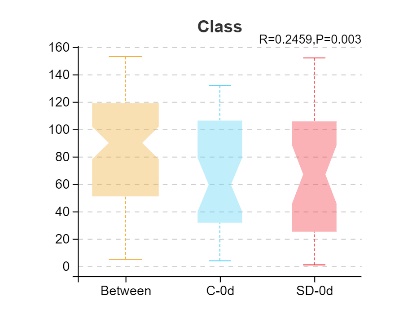

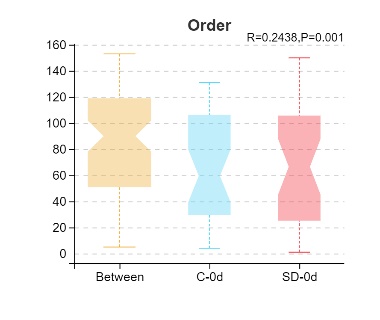


(d) (e)


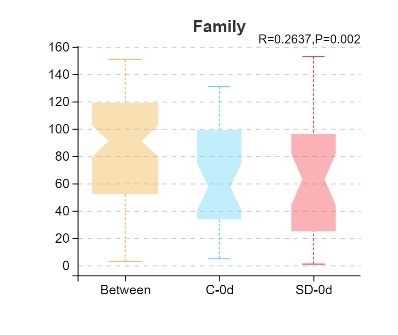

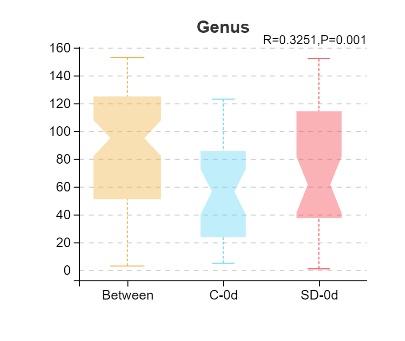


**Figure** **S1** Analysis of similarities (Anosim) test based on Bray–Curtis distances between SD (SD-0d) and control (C-0d) groups before SD at **(a)**phylum(*p*=0.093, *R*=0.0778), **(b)**class(*p*=0.003, *R*=0.2459), **(c)**order(*p*=0.001, *R*=0.2438), **(d)**family(*p*=0.002, *R*=0.2637) and **(e)**genus(*p*=0.001, *R*=0.3251) levels.

(a) (b) (c)


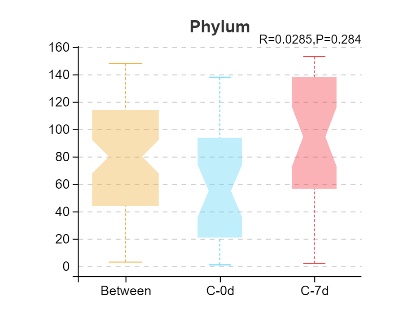

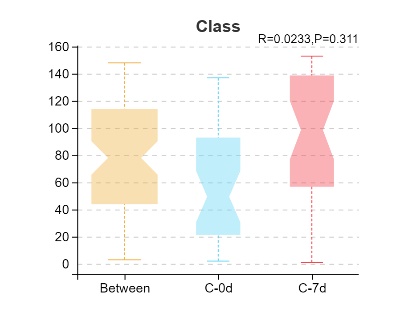

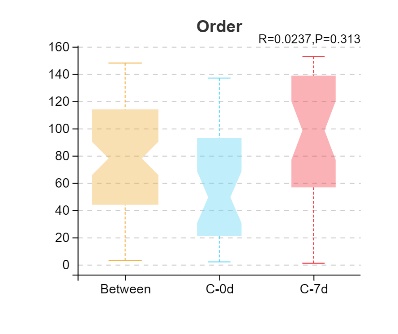


(d) (e)


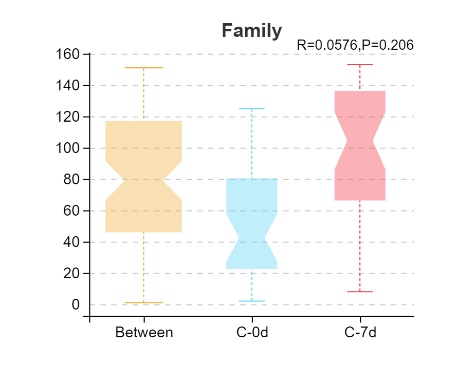

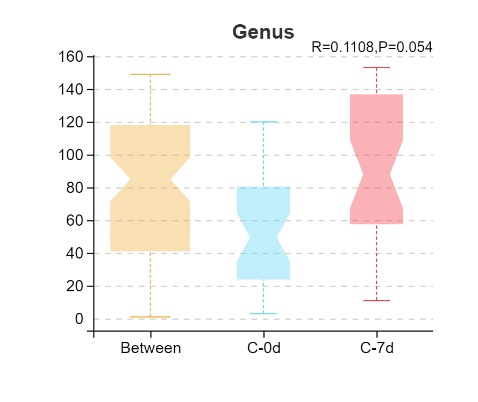


**Figure** **S2** Anosim test based on Bray–Curtis distances between control groups before(C-0d) and after(C-7d) SD at **(a)**phylum(*p*=0.284, *R*=0.0285), **(b)**class(*p*=0.311, *R*=0.0233), **(c)**order(*p*=0.313, *R*=0.0237), **(d)**family(*p*=0.206, *R*=0.0576) and **(e)**genus(*p*=0.054, *R*=0.1108) levels.

(a) (b)


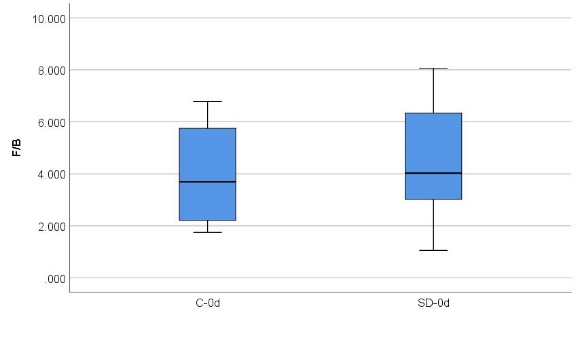

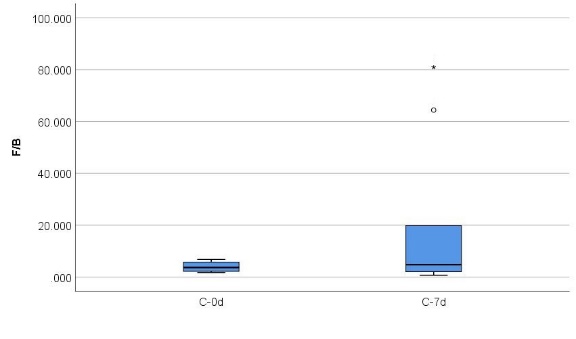


**Figure** **S3(a)** Comparison of the Firmicutes/Bacteroidetes(F/B) ratios between C-0d and SD-0d groups (*U*=44, *p*=0.796, Mann-Whitney U test). **(b)** Comparison of the F/B ratios between C-0d and C-7d groups (*U*=48, *p*=0.546, Mann-Whitney U test). Boxes represent the interquartile ranges. Lines inside the boxes denote medians. The circle and asterisk are outliers.


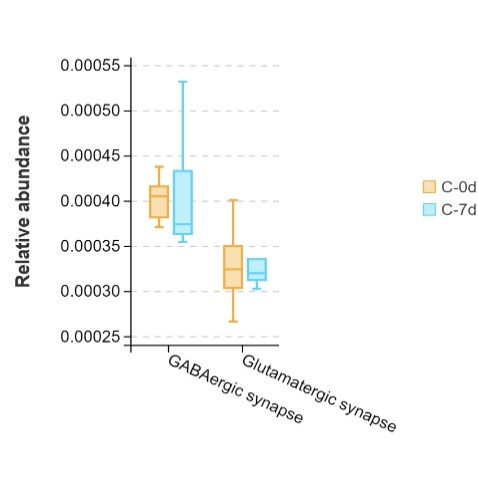


**Figure** S4 Comparison of the gut microbial abundance of KEGG pathways between C-0d and C-7d groups by Wilcoxon test (GABAergic synapses, *q*=0.452; glutamatergic synapses, *q*=0.948). *q*-value, *p*-value after adjusted. Boxes represent the interquartile ranges. Lines inside the boxes denote medians.
